# Supplementary material for: Systemic Antibiotic Use in Acute Irreversible Pulpitis: Evaluating Clinical Practices and Molecular Insights
Source: MDPI journal article supplement (doi:10.3390/ijms25021357), 2024-01-22
Supplement: s1 [file s1]

**Table S1: Number of studies**

| Study                 | Frequency | Percent |
|-----------------------|-----------|---------|
| Cross-sectional Study | 42        | 77.78   |
| Guidelines            | 3         | 5.56    |
| Invitro               | 1         | 1.85    |
| Review                | 4         | 7.41    |
| Systematic review     | 4         | 11.11   |
| Total                 | 54        | 100     |

**Table S2: Level of evidence**

| Level of Evidence | Frequency | Percentage |
|-------------------|-----------|------------|
| Level I           | 7         | 12.96      |
| Level VI          | 42        | 77.78      |
| Level VII         | 6         | 9.26       |
| Total             | 54        | 100        |

**Table S3: Number of samples available for analysis, response rates and mean percentage value for the rate of prescription of antibiotics among various dental professionals**

| Variable                       | Obs   | Mean  | Std. dev. | Min  | Max   |
|--------------------------------|-------|-------|-----------|------|-------|
| Studies with quantitative data | 42    | -     | -         | -    | -     |
| Total Samples                  | 45240 | -     | -         | 67   | 45240 |
| Response Rate                  | 36    | 61.27 | 28.88     | 1.8  | 100   |
| Dentists                       | 31    | 24.6  | 23.74     | 0.05 | 75.7  |
| Specialists                    | 9     | 22.41 | 15.64     | 2.2  | 50.4  |
| Others                         | 4     | 41.77 | 28.95     | 13.3 | 82    |
| Undergraduates                 | 8     | 17.52 | 20.59     | 0    | 62.6  |
